# Supplementary material
Source: publisher figshare collection journal article supplement (https://frontiersin.figshare.com/ndownloader/files/14765522)
Supplement: Supplementary file [file 14765522]

**Table S1. Correlations between  $RF_{vel}$  and simulated muscle activations of RF and between RF and GMed activations in people with SKG during the involuntary response period.** The table shows the correlation coefficients and significance (\*  $p < 0.05$ , \*\* $p < 0.01$ , \*\*\*  $p < 0.001$ ) between  $RF_{vel}$  and simulated RF (left) and, RF and GMed activations (right) during IR for each participant with SKG.

| <b>Subject</b> | $r_{RF_{vel} RF}$ | $r_{RF GMed}$ |
|----------------|-------------------|---------------|
| S1             | 0.41              | 0.31          |
| S2             | 0.58              | 0.95          |
| S3             | 0.95              | 0.48          |
| S4             | 0.23              | 1.35          |
| S5             | 0.38              | 0.75          |
| S6             | 0.56              | 0.72          |
| S7             | 0.33              | 0.1           |
| S8             | 0.2               | 0.38          |
| S9             | 1.08              | 1.61          |
